# Supplementary material for: Time trends, factors associated with, and reasons for COVID-19 vaccine hesitancy: A massive online survey of US adults from January-May 2021
Source: PubMed Central journal article supplement (PMC8691631; doi:10.1371/journal.pone.0260731), 2021-12-21
Supplement: pone.0260731.s002.pdf [file pone.0260731.s002.pdf]

**sTable 1.** Participant flow for Carnegie Mellon University (CMU) Delphi Group’s COVID Trends and Impact Survey (CTIS) by month (January-May, 2021)

|                                            | January <sup>a</sup> | February   | March       | April       | May <sup>b</sup> | Total       |
|--------------------------------------------|----------------------|------------|-------------|-------------|------------------|-------------|
|                                            | <b>N</b>             |            |             |             |                  |             |
| Offered survey                             | 106,387,320          | 95,953,902 | 104,768,154 | 103,399,752 | 66,138,989       | 476,648,117 |
| Did not respond                            | 105,073,194          | 94,721,211 | 103,476,197 | 102,315,236 | 65,576,417       | 471,162,255 |
| Responded                                  | 1,314,126            | 1,232,691  | 1,291,957   | 1,084,516   | 562,572          | 5,485,862   |
| Response rate                              | 1.24%                | 1.28%      | 1.23%       | 1.05%       | 0.85%            | 1.15%       |
| Did not report hesitancy                   | 112,319              | 83,829     | 74468       | 61896       | 32,914           | 365,426     |
| Reported self-describe gender <sup>c</sup> | 6,157                | 6,667      | 7,953       | 6,873       | 4,014            | 31,664      |
| <b>Report sample</b>                       | 1,195,650            | 1,142,195  | 1,209,536   | 1,015,747   | 525,644          | 5,088,772   |
| Vaccinated/Definitely Yes                  | x                    | x          | x           | x           | 435,393          | x           |
| Did not provide reasons                    | x                    | x          | x           | x           | 2,267            | x           |
| <b>Reasons sample</b>                      | x                    | x          | x           | x           | 87,984           | x           |

<sup>a</sup> January data was subset to January 6-31 because January 6 was the first date both vaccine questions (receipt and intent) were both asked.

<sup>b</sup> May data was subset to include only those receiving the survey prior to an update to the vaccine questions; on May 20 a new survey version was offered to approximately 85% of potential respondents.

<sup>c</sup> A review of fill-in responses for self-described gender suggested the majority of participants who selected this category did not complete the survey in good faith (e.g., wrote-in discriminatory statements, and as a group had a high frequency of extreme responses such as the oldest age group and highest education level). Thus, they were excluded from the main analysis. They are included in a sensitivity analysis (sTable 8-9).
