# Supplementary material for: Time trends, factors associated with, and reasons for COVID-19 vaccine hesitancy: A massive online survey of US adults from January-May 2021
Source: PubMed Central journal article supplement (PMC8691631; doi:10.1371/journal.pone.0260731), 2021-12-21
Supplement: pone.0260731.s003.pdf [file pone.0260731.s003.pdf]

**sTable 2.** Weighted demographics of the report sample by month. The distribution of responses is provided including and excluding missing responses for each item.

|                            | January     |             | February    |             | March       |             | April       |             | May         |             |
|----------------------------|-------------|-------------|-------------|-------------|-------------|-------------|-------------|-------------|-------------|-------------|
|                            | Full sample | Not missing | Full sample | Not missing | Full sample | Not missing | Full sample | Not missing | Full sample | Not missing |
| <b>Gender</b>              |             |             |             |             |             |             |             |             |             |             |
| Male                       | 40.04       | 46.03       | 39.34       | 46.09       | 38.79       | 46.01       | 38.93       | 45.94       | 38.76       | 45.68       |
| Female                     | 46.19       | 53.11       | 45.25       | 53.02       | 44.75       | 53.09       | 44.96       | 53.06       | 45.13       | 53.18       |
| Non-binary                 | 0.75        | 0.86        | 0.76        | 0.89        | 0.76        | 0.90        | 0.84        | 1.00        | 0.97        | 1.14        |
| Missing                    | 13.03       | NA          | 14.65       | NA          | 15.70       | NA          | 15.26       | NA          | 15.14       | NA          |
| <b>Age group</b>           |             |             |             |             |             |             |             |             |             |             |
| 18-24 years                | 9.03        | 10.26       | 8.73        | 10.13       | 8.46        | 9.94        | 8.40        | 9.82        | 8.46        | 9.87        |
| 25-34 years                | 14.16       | 16.08       | 13.64       | 15.84       | 13.28       | 15.60       | 13.37       | 15.62       | 13.56       | 15.82       |
| 35-44 years                | 14.42       | 16.39       | 14.21       | 16.50       | 14.02       | 16.47       | 14.18       | 16.57       | 14.13       | 16.49       |
| 45-54 years                | 15.40       | 17.50       | 14.98       | 17.39       | 14.72       | 17.29       | 14.88       | 17.39       | 14.72       | 17.17       |
| 55-64 years                | 15.65       | 17.79       | 15.41       | 17.89       | 15.43       | 18.12       | 15.64       | 18.28       | 15.81       | 18.45       |
| 65-74 years                | 13.48       | 15.31       | 13.34       | 15.48       | 13.49       | 15.85       | 13.40       | 15.66       | 13.24       | 15.46       |
| ≥ 75 years                 | 5.87        | 6.67        | 5.83        | 6.77        | 5.72        | 6.72        | 5.70        | 6.66        | 5.78        | 6.75        |
| Missing                    | 11.99       | NA          | 13.86       | NA          | 14.88       | NA          | 14.44       | NA          | 14.31       | NA          |
| <b>Race/ethnicity</b>      |             |             |             |             |             |             |             |             |             |             |
| White                      | 59.70       | 69.21       | 58.49       | 69.39       | 57.63       | 69.16       | 57.84       | 69.08       | 57.87       | 69.07       |
| Hispanic                   | 14.68       | 17.02       | 14.14       | 16.78       | 13.82       | 16.59       | 13.90       | 16.60       | 13.77       | 16.44       |
| Black                      | 6.33        | 7.34        | 6.10        | 7.23        | 5.76        | 6.91        | 5.54        | 6.62        | 5.46        | 6.52        |
| Asian                      | 2.42        | 2.80        | 2.46        | 2.92        | 2.51        | 3.01        | 2.84        | 3.39        | 3.01        | 3.59        |
| Native American            | 0.92        | 1.07        | 0.89        | 1.05        | 0.75        | 0.90        | 0.71        | 0.84        | 0.71        | 0.84        |
| Pacific Islander           | 0.23        | 0.26        | 0.23        | 0.27        | 0.21        | 0.26        | 0.21        | 0.25        | 0.21        | 0.24        |
| Multi-racial               | 1.98        | 2.30        | 1.99        | 2.36        | 2.65        | 3.17        | 2.69        | 3.22        | 2.76        | 3.30        |
| Unknown (other or missing) | 13.74       | NA          | 15.71       | NA          | 16.67       | NA          | 16.28       | NA          | 16.22       | NA          |

Continued on next page

| <b>Education level</b>      |       |       |       |       |       |       |       |       |       |       |
|-----------------------------|-------|-------|-------|-------|-------|-------|-------|-------|-------|-------|
| ≤ High school               | 20.91 | 24.05 | 19.94 | 23.43 | 19.01 | 22.61 | 18.90 | 22.38 | 19.03 | 22.51 |
| Some college                | 32.00 | 36.81 | 31.13 | 36.59 | 30.73 | 36.55 | 30.68 | 36.33 | 30.84 | 36.46 |
| 4 year degree               | 19.76 | 22.73 | 19.57 | 23.00 | 19.83 | 23.58 | 20.20 | 23.91 | 20.12 | 23.79 |
| Master's                    | 10.15 | 11.67 | 10.27 | 12.07 | 10.35 | 12.30 | 10.44 | 12.36 | 10.30 | 12.18 |
| Professional (e.g., MD, JD) | 2.50  | 2.87  | 2.53  | 2.98  | 2.53  | 3.01  | 2.54  | 3.01  | 2.57  | 3.03  |
| Doctorate                   | 1.61  | 1.86  | 1.64  | 1.93  | 1.63  | 1.94  | 1.70  | 2.01  | 1.71  | 2.02  |
| No response                 | 13.06 | NA    | 14.92 | NA    | 15.91 | NA    | 15.54 | NA    | 15.43 | NA    |
| <b>Employment status</b>    |       |       |       |       |       |       |       |       |       |       |
| Work outside home           | 35.66 | 41.44 | 35.27 | 41.80 | 35.39 | 42.41 | 35.59 | 42.48 | 35.99 | 42.89 |
| Work at home                | 11.81 | 13.72 | 11.06 | 13.11 | 10.82 | 12.97 | 10.95 | 13.07 | 10.61 | 12.65 |
| Does not work for pay       | 38.59 | 44.84 | 38.04 | 45.09 | 37.23 | 44.62 | 37.24 | 44.45 | 37.31 | 44.46 |
| Missing                     | 13.95 | NA    | 15.63 | NA    | 16.55 | NA    | 16.21 | NA    | 16.09 | NA    |
