# Supplementary material for: Time trends, factors associated with, and reasons for COVID-19 vaccine hesitancy: A massive online survey of US adults from January-May 2021
Source: PubMed Central journal article supplement (PMC8691631; doi:10.1371/journal.pone.0260731), 2021-12-21
Supplement: pone.0260731.s004.pdf [file pone.0260731.s004.pdf]

**sTable 3.** COVID-19 vaccine receipt and intent by month (January-May, 2021), among US adults

|                       | January           | February          | March             | April             | May               | Difference (May - January) |
|-----------------------|-------------------|-------------------|-------------------|-------------------|-------------------|----------------------------|
| Already vaccinated    | 10.9 (10.8, 10.9) | 24.3 (24.2, 24.4) | 44.7 (44.6, 44.8) | 68.3 (68.1, 68.4) | 76.4 (76.2, 76.6) | 65.5 (65.4, 65.7)          |
| Yes, definitely       | 45.4 (45.3, 45.5) | 37.4 (37.3, 37.5) | 24.3 (24.2, 24.4) | 8.1 (8.0, 8.2)    | 3.3 (3.2, 3.4)    | -42.1 (-42.2, -42.0)       |
| Yes, probably         | 18.3 (18.2, 18.4) | 14.6 (14.5, 14.7) | 10.6 (10.5, 10.7) | 5.9 (5.8, 6.0)    | 3.7 (3.7, 3.8)    | -14.6 (-14.7, -14.5)       |
| No, probably not      | 13.0 (13.0, 13.1) | 11.5 (11.5, 11.6) | 9.3 (9.2, 9.3)    | 7.1 (7.0, 7.1)    | 6.0 (5.9, 6.1)    | -7.1 (-7.2, -6.9)          |
| No, definitely not    | 12.4 (12.3, 12.4) | 12.1 (12.1, 12.2) | 11.0 (11.0, 11.1) | 10.7 (10.6, 10.7) | 10.6 (10.5, 10.7) | -1.8 (-1.9, -1.7)          |
| Hesitant <sup>a</sup> | 25.4 (25.3, 25.5) | 23.7 (23.6, 23.8) | 20.3 (20.2, 20.4) | 17.7 (17.6, 17.8) | 16.6 (16.4, 16.7) | -8.9 (-9.0, -8.7)          |

<sup>a</sup> Answered that they probably or definitely would not choose to get vaccinated if offered a vaccine to prevent COVID-19
