# Supplementary material for: Time trends, factors associated with, and reasons for COVID-19 vaccine hesitancy: A massive online survey of US adults from January-May 2021
Source: PubMed Central journal article supplement (PMC8691631; doi:10.1371/journal.pone.0260731), 2021-12-21
Supplement: pone.0260731.s005.pdf [file pone.0260731.s005.pdf]

**sTable 4.** COVID-19 vaccine hesitancy by race/ethnicity, education level, US region and county Trump vote share in the 2020 presidential election, respectively, by month (January-May, 2021), among US adults

|                                                           | January           | February          | March             | April             | May               | Difference (May - January) |
|-----------------------------------------------------------|-------------------|-------------------|-------------------|-------------------|-------------------|----------------------------|
|                                                           | <b>% (95% CI)</b> |                   |                   |                   |                   |                            |
| <b>Race/ethnicity among 18 - 34 year olds<sup>a</sup></b> |                   |                   |                   |                   |                   |                            |
| White                                                     | 31.0 (30.7, 31.3) | 29.7 (29.4, 30.0) | 27.2 (26.8, 27.5) | 23.9 (23.6, 24.3) | 22.5 (22.0, 23.0) | -8.5 (-9.1, -7.9)          |
| Hispanic                                                  | 31.7 (31.2, 32.3) | 28.5 (27.9, 29.1) | 23.6 (23.0, 24.2) | 19.0 (18.4, 19.7) | 16.3 (15.5, 17.1) | -15.4 (-16.4, -14.4)       |
| Black                                                     | 58.9 (57.7, 60.0) | 53.0 (51.8, 54.3) | 43.1 (41.8, 44.5) | 34.0 (32.5, 35.6) | 27.4 (25.3, 29.4) | -31.5 (-33.8, -29.2)       |
| Asian                                                     | 12.4 (11.4, 13.4) | 11.6 (10.6, 12.7) | 8.0 (7.1, 8.9)    | 4.6 (3.9, 5.2)    | 3.2 (2.4, 4.0)    | -9.2 (-10.5, -7.9)         |
| Native American                                           | 43.2 (40.4, 46.0) | 39.4 (36.4, 42.4) | 32.4 (29.2, 35.7) | 30.8 (27.3, 34.4) | 33.7 (28.1, 39.3) | -9.4 (-15.7, -3.2)         |
| Pacific Islander                                          | 43.0 (37.0, 49.0) | 30.5 (24.9, 36.1) | 30.8 (24.3, 37.4) | 27.0 (18.4, 35.5) | 15.8 (7.9, 23.6)  | -27.2 (-37.1, -17.4)       |
| Multi-racial                                              | 38.2 (36.9, 39.6) | 37.6 (36.2, 39.1) | 35.5 (34.1, 36.8) | 31.2 (29.7, 32.7) | 29.0 (26.9, 31.1) | -9.2 (-11.7, -6.7)         |
| <b>Education level</b>                                    |                   |                   |                   |                   |                   |                            |
| ≤ High school                                             | 34.8 (34.6, 35.1) | 31.9 (31.6, 32.2) | 26.5 (26.2, 26.7) | 22.9 (22.6, 23.2) | 20.3 (20.0, 20.7) | -14.5 (-14.9, -14.0)       |
| Some college                                              | 27.2 (27.0, 27.3) | 25.3 (25.1, 25.5) | 21.6 (21.5, 21.8) | 18.9 (18.7, 19.1) | 17.9 (17.7, 18.2) | -9.2 (-9.5, -9.0)          |
| 4 year degree                                             | 15.2 (15.1, 15.4) | 14.3 (14.2, 14.5) | 12.2 (12.0, 12.4) | 10.8 (10.7, 11.0) | 10.8 (10.5, 11.0) | -4.5 (-4.8, -4.2)          |
| Master's                                                  | 11.5 (11.4, 11.7) | 10.5 (10.3, 10.7) | 9.0 (8.8, 9.2)    | 8.0 (7.8, 8.2)    | 7.8 (7.6, 8.1)    | -3.7 (-4.0, -3.4)          |
| Professional (e.g., MD, JD)                               | 11.9 (11.4, 12.3) | 11.8 (11.3, 12.2) | 11.0 (10.6, 11.4) | 10.0 (9.5, 10.4)  | 11.1 (10.4, 11.8) | -0.8 (-1.6, 0.0)           |
| Doctorate                                                 | 16.5 (15.8, 17.1) | 16.1 (15.4, 16.8) | 14.6 (13.9, 15.2) | 14.8 (14.1, 15.5) | 14.6 (13.5, 15.6) | -1.9 (-3.1, -0.7)          |
| <b>US Region</b>                                          |                   |                   |                   |                   |                   |                            |
| Midwest                                                   | 26.3 (26.1, 26.5) | 24.7 (24.5, 24.9) | 21.6 (21.5, 21.8) | 19.0 (18.8, 19.2) | 17.7 (17.4, 17.9) | -8.6 (-9.0, -8.3)          |
| South                                                     | 28.5 (28.3, 28.7) | 26.8 (26.6, 26.9) | 22.9 (22.7, 23.1) | 20.0 (19.8, 20.2) | 18.8 (18.6, 19.1) | -9.7 (-10.0, -9.4)         |
| Pacific                                                   | 20.0 (19.7, 20.2) | 18.0 (17.8, 18.3) | 15.2 (15.0, 15.4) | 12.6 (12.3, 12.8) | 11.7 (11.3, 12.0) | -8.3 (-8.7, -7.9)          |
| Mountain                                                  | 24.4 (24.0, 24.7) | 22.9 (22.6, 23.3) | 20.3 (19.9, 20.6) | 18.2 (17.9, 18.6) | 17.5 (17.0, 18.0) | -6.8 (-7.4, -6.2)          |
| Northeast                                                 | 21.6 (21.4, 21.8) | 19.6 (19.4, 19.8) | 16.1 (15.8, 16.3) | 13.7 (13.5, 13.9) | 12.2 (11.9, 12.5) | -9.4 (-9.7, -9.0)          |
| <b>County Trump vote share</b>                            |                   |                   |                   |                   |                   |                            |
| Lowest quartile                                           | 21.7 (21.6, 21.8) | 19.7 (19.6, 19.8) | 16.3 (16.2, 16.4) | 13.7 (13.6, 13.8) | 12.4 (12.3, 12.6) | -9.3 (-9.5, -9.1)          |
| Second lowest quartile                                    | 29.7 (29.5, 29.9) | 28.4 (28.2, 28.7) | 25.2 (24.9, 25.4) | 22.5 (22.3, 22.7) | 21.4 (21.1, 21.8) | -8.3 (-8.7, -7.9)          |
| Second highest quartile                                   | 35.1 (34.7, 35.4) | 33.6 (33.3, 34.0) | 30.2 (29.9, 30.5) | 27.9 (27.5, 28.3) | 27.0 (26.5, 27.6) | -8.1 (-8.7, -7.4)          |
| Highest quartile                                          | 38.8 (38.2, 39.3) | 38.4 (37.8, 38.9) | 35.4 (34.8, 35.9) | 32.6 (32.0, 33.2) | 31.9 (31.1, 32.8) | -6.8 (-7.8, -5.8)          |

Juris Doctorate= JD; MD=Doctor of Medicine.

<sup>a</sup> Race/ethnicity categories are reported among young adults (18-34 years) only, because there was an interaction between race/ethnicity and age, such that race/ethnic comparisons differed by age group. Younger adults were selected because hesitancy was higher among younger versus older adults. Race/ethnicity groups other than the group labeled “Hispanic” are non-Hispanic.
