# Supplementary material for: Time trends, factors associated with, and reasons for COVID-19 vaccine hesitancy: A massive online survey of US adults from January-May 2021
Source: PubMed Central journal article supplement (PMC8691631; doi:10.1371/journal.pone.0260731), 2021-12-21
Supplement: pone.0260731.s006.pdf [file pone.0260731.s006.pdf]

**sTable 5.** COVID-19 vaccine hesitancy in May 2021 by age groups, stratified by race/ethnicity<sup>a</sup> among US adults

|                        | Sample |      | COVID-19 vaccine hesitant |                   |                   |
|------------------------|--------|------|---------------------------|-------------------|-------------------|
|                        | n      | %    | % (95% CI)                | RR (95% CI)       | Adj. RR (95% CI)  |
| <b>White</b>           |        |      |                           |                   |                   |
| 18-24 years            | 9858   | 1.9  | 23.5 (22.5, 24.6)         | 2.89 (2.75, 3.04) | 1.46 (1.38, 1.53) |
| 25-34 years            | 35244  | 6.7  | 21.9 (21.3, 22.4)         | 2.69 (2.60, 2.79) | 1.64 (1.57, 1.70) |
| 35-44 years            | 49337  | 9.4  | 18.6 (18.2, 19.0)         | 2.29 (2.21, 2.37) | 1.47 (1.42, 1.53) |
| 45-54 years            | 54805  | 10.4 | 18.2 (17.9, 18.6)         | 2.24 (2.17, 2.32) | 1.42 (1.37, 1.48) |
| 55-64 years            | 74941  | 14.3 | 13.3 (13.0, 13.6)         | 1.64 (1.58, 1.69) | 1.21 (1.16, 1.25) |
| 65-74 years            | 76794  | 14.6 | 8.1 (7.9, 8.3)            | 1.00 (NA)         | 1.00 (NA)         |
| ≥ 75 years             | 36019  | 6.9  | 6.0 (5.7, 6.2)            | 0.73 (0.69, 0.77) | 0.76 (0.73, 0.80) |
| <b>Hispanic</b>        |        |      |                           |                   |                   |
| 18-24 years            | 3043   | 0.6  | 17.1 (15.5, 18.7)         | 2.84 (2.44, 3.24) | 1.64 (1.42, 1.86) |
| 25-34 years            | 8668   | 1.6  | 15.7 (14.8, 16.6)         | 2.61 (2.30, 2.92) | 1.74 (1.54, 1.93) |
| 35-44 years            | 11700  | 2.2  | 12.5 (11.7, 13.3)         | 2.08 (1.82, 2.34) | 1.42 (1.25, 1.59) |
| 45-54 years            | 12943  | 2.5  | 9.0 (8.5, 9.6)            | 1.50 (1.32, 1.69) | 1.13 (1.00, 1.26) |
| 55-64 years            | 11507  | 2.2  | 7.7 (7.1, 8.2)            | 1.27 (1.11, 1.44) | 1.05 (0.93, 1.18) |
| 65-74 years            | 6481   | 1.2  | 6.0 (5.4, 6.7)            | 1.00 (NA)         | 1.00 (NA)         |
| ≥ 75 years             | 1921   | 0.4  | 15.2 (13.1, 17.4)         | 2.53 (2.08, 2.97) | 1.61 (1.39, 1.84) |
| <b>Black</b>           |        |      |                           |                   |                   |
| 18-24 years            | 626    | 0.1  | 30.9 (26.6, 35.2)         | 7.26 (5.92, 8.61) | 3.51 (2.77, 4.24) |
| 25-34 years            | 2205   | 0.4  | 25.3 (23.3, 27.4)         | 5.96 (5.09, 6.83) | 3.73 (3.18, 4.28) |
| 35-44 years            | 3785   | 0.7  | 18.7 (17.3, 20.0)         | 4.39 (3.77, 5.01) | 2.96 (2.54, 3.37) |
| 45-54 years            | 5536   | 1.1  | 12.2 (11.2, 13.1)         | 2.86 (2.45, 3.28) | 2.13 (1.83, 2.44) |
| 55-64 years            | 8289   | 1.6  | 7.8 (7.2, 8.5)            | 1.84 (1.57, 2.11) | 1.47 (1.26, 1.69) |
| 65-74 years            | 6390   | 1.2  | 4.3 (3.7, 4.8)            | 1.00 (NA)         | 1.00 (NA)         |
| ≥ 75 years             | 1669   | 0.3  | 3.0 (2.1, 4.0)            | 0.71 (0.47, 0.95) | 0.75 (0.51, 0.98) |
| <b>Asian</b>           |        |      |                           |                   |                   |
| 18-24 years            | 612    | 0.1  | 4.0 (2.1, 6.0)            | 2.45 (0.96, 3.94) | 1.68 (0.68, 2.68) |
| 25-34 years            | 2288   | 0.4  | 2.7 (2.0, 3.4)            | 1.65 (0.90, 2.41) | 1.42 (0.78, 2.06) |
| 35-44 years            | 2745   | 0.5  | 2.9 (2.2, 3.6)            | 1.75 (0.96, 2.55) | 1.56 (0.87, 2.24) |
| 45-54 years            | 2234   | 0.4  | 3.3 (2.4, 4.2)            | 2.02 (1.08, 2.95) | 1.70 (0.93, 2.47) |
| 55-64 years            | 1957   | 0.4  | 2.8 (2.0, 3.6)            | 1.69 (0.88, 2.49) | 1.50 (0.80, 2.21) |
| 65-74 years            | 1527   | 0.3  | 1.7 (1.0, 2.3)            | 1.00 (NA)         | 1.00 (NA)         |
| ≥ 75 years             | 586    | 0.1  | 2.4 (0.9, 3.9)            | 1.48 (0.41, 2.54) | 1.51 (0.44, 2.58) |
| <b>Native American</b> |        |      |                           |                   |                   |
| 18-24 years            | 142    | 0.0  | 37.3 (26.0, 48.7)         | 2.76 (1.73, 3.79) | 1.60 (0.95, 2.24) |
| 25-34 years            | 406    | 0.1  | 31.3 (25.8, 36.7)         | 2.31 (1.66, 2.96) | 1.28 (0.98, 1.58) |
| 35-44 years            | 574    | 0.1  | 27.2 (23.1, 31.4)         | 2.01 (1.48, 2.55) | 1.32 (1.03, 1.61) |
| 45-54 years            | 841    | 0.2  | 24.3 (21.1, 27.6)         | 1.80 (1.34, 2.26) | 1.19 (0.94, 1.45) |
| 55-64 years            | 1031   | 0.2  | 21.8 (19.0, 24.6)         | 1.61 (1.20, 2.02) | 1.18 (0.93, 1.43) |
| 65-74 years            | 691    | 0.1  | 13.5 (10.6, 16.5)         | 1.00 (NA)         | 1.00 (NA)         |
| ≥ 75 years             | 244    | 0.0  | 17.7 (12.1, 23.3)         | 1.31 (0.80, 1.81) | 1.36 (0.92, 1.81) |

Continued next page

| Pacific Islander <sup>a</sup> |      |     |                   |                    |                    |
|-------------------------------|------|-----|-------------------|--------------------|--------------------|
| 18-24 years                   | 20   | 0.0 | 6.0 (-4.3, 16.2)  | 0.81 (-0.66, 2.28) | 0.62 (-0.45, 1.69) |
| 25-34 years                   | 68   | 0.0 | 21.2 (11.2, 31.1) | 2.87 (0.77, 4.97)  | 1.47 (0.46, 2.47)  |
| 35-44 years                   | 150  | 0.0 | 14.1 (7.9, 20.4)  | 1.92 (0.55, 3.29)  | 1.46 (0.50, 2.43)  |
| 45-54 years                   | 230  | 0.0 | 16.5 (10.8, 22.1) | 2.24 (0.77, 3.70)  | 1.54 (0.59, 2.48)  |
| 55-64 years                   | 277  | 0.1 | 11.6 (7.2, 16.1)  | 1.58 (0.51, 2.65)  | 1.28 (0.46, 2.09)  |
| 65-74 years                   | 190  | 0.0 | 7.4 (3.3, 11.5)   | 1.00 (NA)          | 1.00 (NA)          |
| ≥ 75 years                    | 56   | 0.0 | 14.5 (2.6, 26.4)  | 1.97 (0.01, 3.92)  | 1.64 (0.44, 2.83)  |
| Multi-racial                  |      |     |                   |                    |                    |
| 18-24 years                   | 880  | 0.2 | 29.7 (26.0, 33.4) | 1.90 (1.58, 2.23)  | 1.20 (1.03, 1.38)  |
| 25-34 years                   | 2209 | 0.4 | 28.5 (26.3, 30.7) | 1.83 (1.57, 2.08)  | 1.27 (1.11, 1.42)  |
| 35-44 years                   | 2557 | 0.5 | 30.0 (28.0, 32.0) | 1.92 (1.67, 2.18)  | 1.29 (1.13, 1.44)  |
| 45-54 years                   | 2385 | 0.5 | 28.3 (26.3, 30.4) | 1.82 (1.57, 2.07)  | 1.23 (1.08, 1.38)  |
| 55-64 years                   | 2491 | 0.5 | 24.6 (22.7, 26.5) | 1.58 (1.36, 1.80)  | 1.16 (1.02, 1.30)  |
| 65-74 years                   | 1803 | 0.3 | 15.6 (13.8, 17.4) | 1.00 (NA)          | 1.00 (NA)          |
| ≥ 75 years                    | 660  | 0.1 | 17.6 (13.6, 21.6) | 1.13 (0.84, 1.42)  | 0.89 (0.72, 1.05)  |

<sup>a</sup> Race/ethnicity groups other than the group labeled “Hispanic” are non-Hispanic.

<sup>b</sup> The Hispanic ≥ 75 years group has unusually high rates of self-describe gender; results were attenuated in a sensitivity analysis with that group (self-describe gender) removed.

<sup>c</sup> Due to the limited sample size of age groups among Pacific Islanders, the 95% CI of the RR estimates are large.
