# Supplementary material for: Time trends, factors associated with, and reasons for COVID-19 vaccine hesitancy: A massive online survey of US adults from January-May 2021
Source: PubMed Central journal article supplement (PMC8691631; doi:10.1371/journal.pone.0260731), 2021-12-21
Supplement: pone.0260731.s007.pdf [file pone.0260731.s007.pdf]

**sTable 6.** COVID-19 vaccine hesitancy in May 2021 by race/ethnicity<sup>a</sup>, stratified by age groups, among US adults

|                    | Sample |      | COVID-19 vaccine hesitant |                    |                    |
|--------------------|--------|------|---------------------------|--------------------|--------------------|
|                    | n      | %    | % (95% CI)                | RR (95% CI)        | Adj. RR (95% CI)   |
| <b>18-24 years</b> |        |      |                           |                    |                    |
| White              | 9858   | 1.9  | 23.5 (22.5, 24.6)         | 1.00 (NA)          | 1.00 (NA)          |
| Hispanic           | 3043   | 0.6  | 17.1 (15.5, 18.7)         | 0.73 (0.65, 0.80)  | 0.92 (0.84, 1.01)  |
| Black              | 626    | 0.1  | 30.9 (26.6, 35.2)         | 1.31 (1.12, 1.51)  | 1.47 (1.21, 1.73)  |
| Asian              | 612    | 0.1  | 4.0 (2.1, 6.0)            | 0.17 (0.09, 0.25)  | 0.38 (0.20, 0.55)  |
| Native American    | 142    | 0.0  | 37.3 (26.0, 48.7)         | 1.59 (1.10, 2.08)  | 1.43 (0.92, 1.95)  |
| Pacific Islander   | 20     | 0.0  | 6.0 (-4.3, 16.2)          | 0.25 (-0.18, 0.69) | 0.44 (-0.29, 1.17) |
| Multi-racial       | 880    | 0.2  | 29.7 (26.0, 33.4)         | 1.26 (1.09, 1.43)  | 1.26 (1.12, 1.39)  |
| <b>25-34 years</b> |        |      |                           |                    |                    |
| White              | 35244  | 6.7  | 21.9 (21.3, 22.4)         | 1.00 (NA)          | 1.00 (NA)          |
| Hispanic           | 8668   | 1.6  | 15.7 (14.8, 16.6)         | 0.72 (0.68, 0.76)  | 0.87 (0.82, 0.92)  |
| Black              | 2205   | 0.4  | 25.3 (23.3, 27.4)         | 1.16 (1.06, 1.26)  | 1.38 (1.26, 1.50)  |
| Asian              | 2288   | 0.4  | 2.7 (2.0, 3.4)            | 0.12 (0.09, 0.16)  | 0.28 (0.21, 0.36)  |
| Native American    | 406    | 0.1  | 31.3 (25.8, 36.7)         | 1.43 (1.18, 1.68)  | 1.02 (0.87, 1.18)  |
| Pacific Islander   | 68     | 0.0  | 21.2 (11.2, 31.1)         | 0.97 (0.51, 1.43)  | 0.93 (0.52, 1.35)  |
| Multi-racial       | 2209   | 0.4  | 28.5 (26.3, 30.7)         | 1.30 (1.20, 1.41)  | 1.18 (1.09, 1.26)  |
| <b>35-44 years</b> |        |      |                           |                    |                    |
| White              | 49337  | 9.4  | 18.6 (18.2, 19.0)         | 1.00 (NA)          | 1.00 (NA)          |
| Hispanic           | 11700  | 2.2  | 12.5 (11.7, 13.3)         | 0.67 (0.63, 0.72)  | 0.79 (0.74, 0.84)  |
| Black              | 3785   | 0.7  | 18.7 (17.3, 20.0)         | 1.00 (0.93, 1.08)  | 1.22 (1.13, 1.32)  |
| Asian              | 2745   | 0.5  | 2.9 (2.2, 3.6)            | 0.16 (0.12, 0.20)  | 0.34 (0.26, 0.43)  |
| Native American    | 574    | 0.1  | 27.2 (23.1, 31.4)         | 1.46 (1.24, 1.69)  | 1.17 (1.03, 1.32)  |
| Pacific Islander   | 150    | 0.0  | 14.1 (7.9, 20.4)          | 0.76 (0.42, 1.10)  | 1.04 (0.62, 1.46)  |
| Multi-racial       | 2557   | 0.5  | 30.0 (28.0, 32.0)         | 1.61 (1.50, 1.73)  | 1.33 (1.25, 1.41)  |
| <b>45-54 years</b> |        |      |                           |                    |                    |
| White              | 54805  | 10.4 | 18.2 (17.9, 18.6)         | 1.00 (NA)          | 1.00 (NA)          |
| Hispanic           | 12943  | 2.5  | 9.0 (8.5, 9.6)            | 0.50 (0.47, 0.53)  | 0.65 (0.61, 0.69)  |
| Black              | 5536   | 1.1  | 12.2 (11.2, 13.1)         | 0.67 (0.61, 0.72)  | 0.91 (0.84, 0.98)  |
| Asian              | 2234   | 0.4  | 3.3 (2.4, 4.2)            | 0.18 (0.13, 0.23)  | 0.39 (0.29, 0.49)  |
| Native American    | 841    | 0.2  | 24.3 (21.1, 27.6)         | 1.33 (1.16, 1.51)  | 1.10 (0.97, 1.23)  |
| Pacific Islander   | 230    | 0.0  | 16.5 (10.8, 22.1)         | 0.90 (0.59, 1.21)  | 1.13 (0.76, 1.49)  |
| Multi-racial       | 2385   | 0.5  | 28.3 (26.3, 30.4)         | 1.55 (1.44, 1.67)  | 1.32 (1.23, 1.40)  |
| <b>55-64 years</b> |        |      |                           |                    |                    |
| White              | 74941  | 14.3 | 13.3 (13.0, 13.6)         | 1.00 (NA)          | 1.00 (NA)          |
| Hispanic           | 11507  | 2.2  | 7.7 (7.1, 8.2)            | 0.58 (0.53, 0.62)  | 0.71 (0.66, 0.76)  |
| Black              | 8289   | 1.6  | 7.8 (7.2, 8.5)            | 0.59 (0.54, 0.64)  | 0.74 (0.68, 0.81)  |
| Asian              | 1957   | 0.4  | 2.8 (2.0, 3.6)            | 0.21 (0.15, 0.27)  | 0.41 (0.29, 0.52)  |
| Native American    | 1031   | 0.2  | 21.8 (19.0, 24.6)         | 1.64 (1.42, 1.85)  | 1.27 (1.14, 1.41)  |
| Pacific Islander   | 277    | 0.1  | 11.6 (7.2, 16.1)          | 0.88 (0.54, 1.21)  | 1.10 (0.69, 1.51)  |
| Multi-racial       | 2491   | 0.5  | 24.6 (22.7, 26.5)         | 1.85 (1.71, 2.00)  | 1.46 (1.37, 1.56)  |

Continued next page

| 65-74 years      |       |      |                   |                   |                   |
|------------------|-------|------|-------------------|-------------------|-------------------|
| White            | 76794 | 14.6 | 8.1 (7.9, 8.3)    | 1.00 (NA)         | 1.00 (NA)         |
| Hispanic         | 6481  | 1.2  | 6.0 (5.4, 6.7)    | 0.74 (0.66, 0.82) | 0.82 (0.74, 0.90) |
| Black            | 6390  | 1.2  | 4.3 (3.7, 4.8)    | 0.52 (0.46, 0.59) | 0.61 (0.53, 0.68) |
| Asian            | 1527  | 0.3  | 1.7 (1.0, 2.3)    | 0.20 (0.13, 0.28) | 0.33 (0.21, 0.45) |
| Native American  | 691   | 0.1  | 13.5 (10.6, 16.5) | 1.67 (1.30, 2.03) | 1.31 (1.07, 1.55) |
| Pacific Islander | 190   | 0.0  | 7.4 (3.3, 11.5)   | 0.91 (0.40, 1.41) | 1.04 (0.50, 1.59) |
| Multi-racial     | 1803  | 0.3  | 15.6 (13.8, 17.4) | 1.92 (1.69, 2.15) | 1.52 (1.36, 1.68) |
| ≥ 75 years       |       |      |                   |                   |                   |
| White            | 36019 | 6.9  | 6.0 (5.7, 6.2)    | 1.00 (NA)         | 1.00 (NA)         |
| Hispanic         | 1921  | 0.4  | 15.2 (13.1, 17.4) | 2.56 (2.18, 2.94) | 1.73 (1.54, 1.92) |
| Black            | 1669  | 0.3  | 3.0 (2.1, 4.0)    | 0.50 (0.34, 0.67) | 0.59 (0.42, 0.77) |
| Asian            | 586   | 0.1  | 2.4 (0.9, 3.9)    | 0.41 (0.16, 0.66) | 0.65 (0.26, 1.03) |
| Native American  | 244   | 0.0  | 17.7 (12.1, 23.3) | 2.97 (2.02, 3.91) | 2.33 (1.69, 2.98) |
| Pacific Islander | 56    | 0.0  | 14.5 (2.6, 26.4)  | 2.43 (0.43, 4.43) | 2.23 (1.09, 3.38) |
| Multi-racial     | 660   | 0.1  | 17.6 (13.6, 21.6) | 2.95 (2.27, 3.64) | 1.77 (1.48, 2.06) |

<sup>a</sup> Race/ethnicity groups other than the group labeled “Hispanic” are non-Hispanic.

<sup>b</sup> The Hispanic ≥ 75 years has unusually high rates of self-describe gender; results were attenuated in a sensitivity analysis with that group (self-describe gender) removed
