# Supplementary material for: Time trends, factors associated with, and reasons for COVID-19 vaccine hesitancy: A massive online survey of US adults from January-May 2021
Source: PubMed Central journal article supplement (PMC8691631; doi:10.1371/journal.pone.0260731), 2021-12-21
Supplement: pone.0260731.s008.pdf [file pone.0260731.s008.pdf]

**sTable 7.** COVID-19 vaccine hesitancy in May 2021 by health condition and status<sup>a</sup> among US adults

|                                                       | Sample |      | COVID-19 vaccine hesitant |                   |                   |
|-------------------------------------------------------|--------|------|---------------------------|-------------------|-------------------|
|                                                       | n      | %    | % (95% CI)                | RR (95% CI)       | Adj. RR (95% CI)  |
| None                                                  | 182782 | 34.8 | 18.7 (18.5, 19.0)         | 1.0 (NA)          | 1.0 (NA)          |
| Cancer (other than skin)                              | 10355  | 2.0  | 8.9 (8.2, 9.5)            | 0.47 (0.44, 0.51) | 0.80 (0.75, 0.85) |
| Diabetes Type II                                      | 19671  | 3.7  | 9.6 (9.1, 10.1)           | 0.51 (0.49, 0.54) | 0.83 (0.79, 0.86) |
| Obesity                                               | 50985  | 9.7  | 10.9 (10.5, 11.3)         | 0.58 (0.56, 0.60) | 0.79 (0.76, 0.81) |
| Diabetes Type I                                       | 2614   | 0.5  | 12.2 (10.7, 13.8)         | 0.65 (0.57, 0.74) | 0.86 (0.75, 0.96) |
| High blood pressure                                   | 48953  | 9.3  | 13.2 (12.8, 13.6)         | 0.70 (0.68, 0.73) | 0.95 (0.92, 0.98) |
| Kidney disease                                        | 2344   | 0.4  | 13.3 (11.6, 15.0)         | 0.71 (0.62, 0.80) | 1.07 (0.94, 1.19) |
| Chronic obstructive pulmonary disease                 | 6380   | 1.2  | 13.7 (12.5, 15.0)         | 0.73 (0.67, 0.80) | 1.03 (0.96, 1.11) |
| Multiple conditions                                   | 127693 | 24.3 | 14.0 (13.7, 14.2)         | 0.75 (0.73, 0.76) | 1.13 (1.11, 1.15) |
| Heart attack, heart disease, or other heart condition | 12821  | 2.4  | 14.6 (13.9, 15.4)         | 0.78 (0.74, 0.83) | 1.11 (1.06, 1.17) |
| Autoimmune disorder                                   | 9700   | 1.8  | 15.1 (14.2, 16.0)         | 0.80 (0.76, 0.85) | 1.06 (1.01, 1.12) |
| Asthma                                                | 26313  | 5.0  | 16.6 (15.9, 17.2)         | 0.89 (0.85, 0.92) | 1.03 (0.99, 1.06) |
| Weakened or compromised immune system                 | 4359   | 0.8  | 20.7 (19.1, 22.2)         | 1.10 (1.02, 1.19) | 1.43 (1.33, 1.52) |
| No response                                           | 20674  | 3.9  | 35.5 (34.6, 36.3)         | 1.89 (1.84, 1.95) | 1.71 (1.66, 1.76) |

<sup>a</sup> Participants were categorized as having high blood pressure only, each of the other conditions with or without high blood pressure, or “multiple conditions,” defined as at least two conditions excluding high blood pressure, which was relatively common and has limited support as a risk-factor for poor COVID-19 outcomes.
