# Supplementary material for: Time trends, factors associated with, and reasons for COVID-19 vaccine hesitancy: A massive online survey of US adults from January-May 2021
Source: PubMed Central journal article supplement (PMC8691631; doi:10.1371/journal.pone.0260731), 2021-12-21
Supplement: pone.0260731.s011.pdf [file pone.0260731.s011.pdf]

**sTable 10.** Reasons for COVID-19 vaccine hesitancy in May 21 by race/ethnicity<sup>a</sup> among hesitant US adults (N=73362)<sup>b</sup>

|                                                 | White                | Hispanic             | Black                | Asian                | NA                   | PI                   | Multi-racial         | Unknown              |
|-------------------------------------------------|----------------------|----------------------|----------------------|----------------------|----------------------|----------------------|----------------------|----------------------|
| N                                               | 44067                | 6028                 | 3126                 | 339                  | 824                  | 124                  | 3117                 | 15737                |
|                                                 | % (95% CI)           |                      |                      |                      |                      |                      |                      |                      |
| Concerned about possible side effects           | 51.5<br>(50.9, 52.1) | 49.3<br>(47.6, 50.9) | 51.4<br>(49.3, 53.5) | 48.5<br>(41.6, 55.5) | 41.4<br>(37.1, 45.7) | 43.7<br>(33.5, 53.9) | 58.5<br>(56.3, 60.7) | 42.0<br>(41.0, 43.0) |
| Don't trust COVID-19 vaccines                   | 50.5<br>(49.9, 51.0) | 44.8<br>(43.1, 46.5) | 46.1<br>(43.9, 48.2) | 38.4<br>(31.5, 45.4) | 45.7<br>(41.2, 50.1) | 45.0<br>(34.8, 55.1) | 55.1<br>(52.9, 57.3) | 44.8<br>(43.7, 45.8) |
| Don't trust the government                      | 43.2<br>(42.6, 43.8) | 35.9<br>(34.3, 37.6) | 34.3<br>(32.2, 36.3) | 26.2<br>(20.1, 32.2) | 42.9<br>(38.3, 47.5) | 34.4<br>(24.8, 44.1) | 50.0<br>(47.8, 52.3) | 40.0<br>(39.0, 41.0) |
| Don't believe I need it                         | 41.8<br>(41.2, 42.4) | 32.3<br>(30.6, 33.9) | 22.3<br>(20.4, 24.3) | 33.1<br>(26.2, 40.1) | 32.6<br>(28.6, 36.6) | 28.5<br>(18.9, 38.1) | 47.0<br>(44.7, 49.2) | 33.8<br>(32.9, 34.8) |
| Plan to wait and to see if safe                 | 33.9<br>(33.3, 34.5) | 41.8<br>(40.1, 43.4) | 41.1<br>(39.0, 43.2) | 42.5<br>(35.5, 49.5) | 27.0<br>(23.1, 30.8) | 35.5<br>(26.0, 45.1) | 34.4<br>(32.2, 36.5) | 31.2<br>(30.3, 32.2) |
| Concerned about an allergic reaction            | 23.2<br>(22.7, 23.7) | 26.6<br>(25.1, 28.1) | 33.1<br>(31.0, 35.1) | 26.8<br>(20.0, 33.6) | 24.6<br>(21.0, 28.2) | 27.4<br>(18.5, 36.2) | 32.5<br>(30.4, 34.5) | 21.1<br>(20.3, 21.9) |
| Don't know if it will work                      | 22.1<br>(21.6, 22.6) | 22.7<br>(21.2, 24.1) | 21.2<br>(19.4, 23.0) | 26.4<br>(19.4, 33.4) | 17.2<br>(14.0, 20.3) | 24.7<br>(16.1, 33.4) | 27.6<br>(25.6, 29.6) | 20.1<br>(19.2, 20.9) |
| Don't like vaccines                             | 13.7<br>(13.3, 14.2) | 15.4<br>(14.0, 16.8) | 14.4<br>(12.9, 15.9) | 13.7<br>(9.5, 17.8)  | 13.1<br>(10.5, 15.8) | 14.2<br>(7.2, 21.3)  | 18.3<br>(16.5, 20.1) | 16.1<br>(15.3, 16.9) |
| Safety concern because of my health condition   | 12.0<br>(11.7, 12.3) | 11.9<br>(10.7, 13.0) | 15.9<br>(14.5, 17.4) | 11.8<br>(8.0, 15.5)  | 13.1<br>(10.8, 15.5) | 10.3<br>(4.4, 16.2)  | 18.9<br>(17.3, 20.6) | 10.6<br>(10.1, 11.1) |
| Other people need it more                       | 11.9<br>(11.5, 12.3) | 16.9<br>(15.4, 18.4) | 10.4<br>(9.0, 11.7)  | 17.6<br>(11.6, 23.6) | 10.6<br>(7.9, 13.2)  | 15.5<br>(8.1, 22.8)  | 15.7<br>(14.0, 17.5) | 12.3<br>(11.6, 13.0) |
| Doctor has not recommended                      | 9.0<br>(8.7, 9.3)    | 9.7<br>(8.5, 11.0)   | 7.6<br>(6.3, 8.9)    | 7.7<br>(4.5, 10.8)   | 9.5<br>(7.2, 11.8)   | 2.8<br>(0.2, 5.4)    | 14.7<br>(13.0, 16.3) | 9.2<br>(8.7, 9.8)    |
| Against religious beliefs                       | 6.7<br>(6.4, 7.1)    | 10.3<br>(9.1, 11.5)  | 7.5<br>(6.4, 8.7)    | 5.6<br>(3.1, 8.1)    | 13.0<br>(10.3, 15.8) | 3.1<br>(0.4, 5.8)    | 13.5<br>(12.0, 15.0) | 9.7<br>(9.1, 10.3)   |
| Currently/planning to be pregnant/breastfeeding | 6.1<br>(5.8, 6.4)    | 10.0<br>(8.8, 11.2)  | 7.0<br>(5.9, 8.1)    | 11.4<br>(7.5, 15.3)  | 4.1<br>(2.3, 5.8)    | 4.1<br>(0.4, 7.9)    | 8.5<br>(7.2, 9.8)    | 6.2<br>(5.7, 6.6)    |
| Concerned about cost                            | 2.3<br>(2.1, 2.5)    | 4.9<br>(3.8, 6.1)    | 3.3<br>(2.5, 4.0)    | 3.9<br>(-0.2, 8.0)   | 2.1<br>(1.0, 3.2)    | 2.5<br>(-0.5, 5.4)   | 5.5<br>(4.4, 6.6)    | 4.3<br>(3.9, 4.8)    |
| Other                                           | 15.2<br>(14.8, 15.6) | 13.2<br>(12.2, 14.2) | 11.5<br>(10.2, 12.9) | 16.8<br>(10.6, 23.0) | 19.5<br>(16.2, 22.7) | 17.9<br>(10.3, 25.6) | 22.9<br>(21.0, 24.8) | 19.0<br>(18.3, 19.8) |

NA=Native American; NH=Non-Hispanic; PI=Pacific Islander.

<sup>a</sup> Race/ethnicity groups other than the group labeled "Hispanic" are non-Hispanic.

<sup>b</sup> Answered that they probably or definitely would not choose to get vaccinated if offered a vaccine to prevent COVID-19.
